# Supplementary material for: Inositol Pyrophosphates and Their Unique Metabolic Complexity: Analysis by Gel Electrophoresis
Source: PLOS journal article supplement (doi:10.1371/journal.pone.0005580), 2009-05-15
Supplement: S5 (10.1371/journal.pone.0005580.s005) [file journal.pone.0005580.s005]

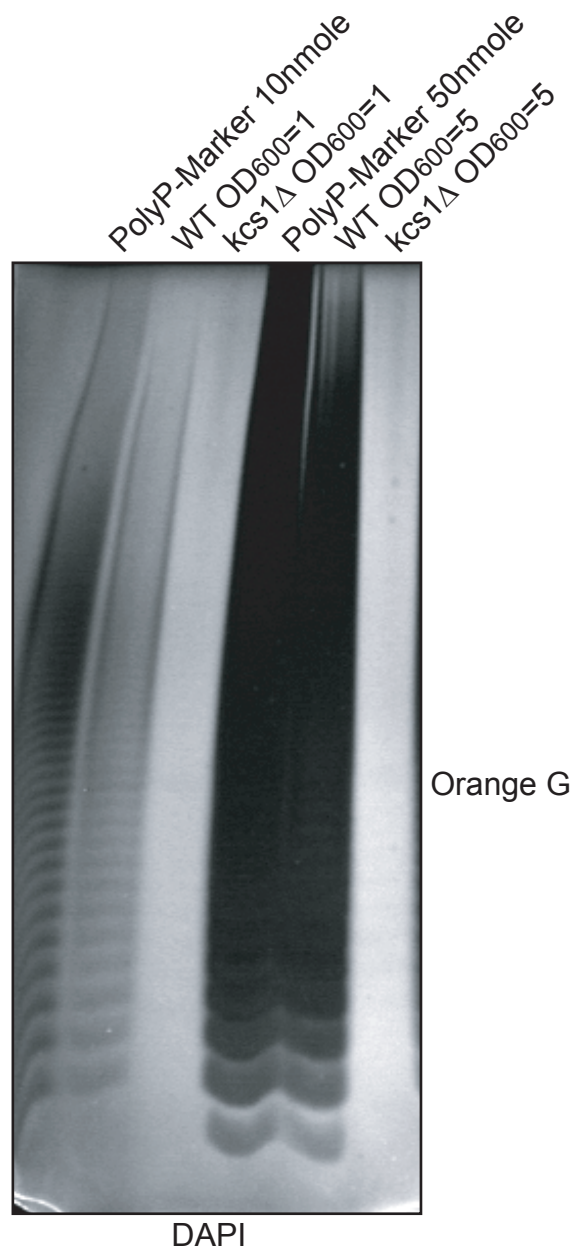

Supporting Figure S5. PAGE analysis of inositol polyphosphates extracted from wild type and *kcs1Δ* yeast. Inositol polyphosphates were extracted as previously described [1] from one or five OD600 of early logarithmic growth cultures. The samples were resolved on 33.3% polyacrylamide gel and visualized by DAPI staining revealing the presence of a ladder of negatively stained bands in wild type (WT) yeast. This intense laddering is typical of inorganic polyphosphate (PolyP), a phosphate polymer that is abundant in yeast [2]. The co-purification of PolyP obscures the inositol pyrophosphates making them undetectable. PolyP synthesis is dramatically reduced in *kcs1Δ* yeast [3]. Our analysis confirms these data revealing the absence of any detectable PolyP [3] or inositol pyrophosphates [4] in *kcs1Δ* cells.

#### References

1. Azevedo C. and Saiardi A. (2006) Extraction and analysis of soluble inositol polyphosphates from yeast. *Nat Protoc.* 1: 2416-22
2. Kornberg A, Rao NN, Ault-Riché D. (1999) Inorganic polyphosphate: a molecule of many functions. *Annu Rev Biochem.* 68:89-125.
3. Auesukaree C, Tochio H, Shirakawa M, Kaneko Y, Harashima S. (2005) Plc1p, Arg82p, and Kcs1p, enzymes involved in inositol pyrophosphate synthesis, are essential for phosphate regulation and polyphosphate accumulation in *Saccharomyces cerevisiae*. *J Biol Chem.* 280:25127-33.
4. Dubois E, Scherens B, Vierendeels F, Ho MM, Messenguy F, Shears SB. (2002) In *Saccharomyces cerevisiae*, the inositol polyphosphate kinase activity of Kcs1p is required for resistance to salt stress, cell wall integrity, and vacuolar morphogenesis. *J Biol Chem.* 277:23755-63
